# Supplementary material
Source: PubMed Central journal article supplement (PMC2841478)
Supplement: NIHMS179528-supplement-1_si_001.pdf [file NIHMS179528-supplement-1_si_001.pdf]

**Development of 3-Phenyltropane Analogs with High Affinity for the Dopamine and Serotonin Transporter and Low Affinity for the Norepinephrine Transporter**

*Chunyang Jin, Hernán A. Navarro, and F. Ivy Carroll\**

<sup>†</sup>Center for Organic and Medicinal Chemistry, Research Triangle Institute,  
Research Triangle Park, North Carolina 27709-2194

Supporting Information

Analysis Appendix

| Compd     | Formula                                                                                           | Calculated |      |      | Found |      |      |
|-----------|---------------------------------------------------------------------------------------------------|------------|------|------|-------|------|------|
|           |                                                                                                   | C          | H    | N    | C     | H    | N    |
| <b>7a</b> | C <sub>17</sub> H <sub>24</sub> ClNO <sub>3</sub> ·H <sub>2</sub> O                               | 59.38      | 7.62 | 4.07 | 59.08 | 7.59 | 3.88 |
| <b>7b</b> | C <sub>18</sub> H <sub>26</sub> ClNO <sub>3</sub> ·1.75H <sub>2</sub> O                           | 58.21      | 8.01 | 3.77 | 58.03 | 8.00 | 3.76 |
| <b>7c</b> | C <sub>17</sub> H <sub>23</sub> ClFNO <sub>3</sub> ·1.25H <sub>2</sub> O                          | 55.74      | 7.02 | 3.82 | 55.80 | 7.02 | 3.66 |
| <b>7d</b> | C <sub>17</sub> H <sub>23</sub> BrClNO <sub>3</sub> ·0.75H <sub>2</sub> O                         | 48.82      | 5.90 | 3.35 | 48.76 | 5.91 | 3.07 |
| <b>7e</b> | C <sub>17</sub> H <sub>22</sub> Br <sub>2</sub> ClNO <sub>3</sub>                                 | 42.22      | 4.59 | 2.90 | 41.87 | 4.60 | 2.75 |
| <b>7f</b> | C <sub>17</sub> H <sub>23</sub> ClINO <sub>3</sub> ·H <sub>2</sub> O                              | 43.47      | 5.36 | 2.98 | 43.74 | 5.45 | 2.90 |
| <b>7g</b> | C <sub>17</sub> H <sub>22</sub> ClI <sub>2</sub> NO <sub>3</sub> ·0.5H <sub>2</sub> O             | 34.81      | 3.95 | 2.39 | 34.76 | 3.93 | 2.29 |
| <b>8a</b> | C <sub>19</sub> H <sub>28</sub> ClNO <sub>3</sub>                                                 | 64.49      | 7.98 | 3.96 | 64.75 | 8.05 | 3.92 |
| <b>8b</b> | C <sub>19</sub> H <sub>26</sub> ClNO <sub>3</sub> ·1.25H <sub>2</sub> O                           | 60.95      | 7.67 | 3.74 | 61.19 | 7.72 | 3.63 |
| <b>8c</b> | C <sub>20</sub> H <sub>28</sub> ClNO <sub>3</sub>                                                 | 65.65      | 7.71 | 3.83 | 65.93 | 7.87 | 3.70 |
| <b>8d</b> | C <sub>24</sub> H <sub>29</sub> ClN <sub>2</sub> O <sub>5</sub> ·0.75H <sub>2</sub> O             | 60.76      | 6.48 | 5.90 | 60.57 | 6.51 | 5.95 |
| <b>8e</b> | C <sub>24</sub> H <sub>32</sub> Cl <sub>2</sub> N <sub>2</sub> O <sub>3</sub> ·H <sub>2</sub> O   | 59.38      | 7.06 | 5.77 | 59.51 | 6.97 | 5.73 |
| <b>8f</b> | C <sub>26</sub> H <sub>33</sub> ClN <sub>2</sub> O <sub>4</sub> ·1.5H <sub>2</sub> O              | 62.45      | 7.26 | 5.60 | 62.30 | 7.08 | 5.50 |
| <b>8g</b> | C <sub>24</sub> H <sub>30</sub> BrClN <sub>2</sub> O <sub>3</sub> ·1.25H <sub>2</sub> O           | 54.15      | 6.15 | 5.26 | 54.07 | 5.93 | 5.15 |
| <b>8h</b> | C <sub>24</sub> H <sub>29</sub> Br <sub>2</sub> ClN <sub>2</sub> O <sub>3</sub> ·H <sub>2</sub> O | 47.51      | 5.15 | 4.62 | 47.29 | 5.18 | 4.53 |
| <b>8i</b> | C <sub>24</sub> H <sub>30</sub> ClIN <sub>2</sub> O <sub>3</sub> ·1.5H <sub>2</sub> O             | 49.37      | 5.70 | 4.80 | 49.09 | 5.62 | 4.52 |
| <b>8j</b> | C <sub>24</sub> H <sub>29</sub> ClI <sub>2</sub> N <sub>2</sub> O <sub>3</sub> ·H <sub>2</sub> O  | 41.13      | 4.46 | 4.00 | 41.28 | 4.41 | 3.84 |
| <b>9</b>  | C <sub>25</sub> H <sub>29</sub> ClN <sub>2</sub> O <sub>2</sub> ·0.25H <sub>2</sub> O             | 69.92      | 6.92 | 6.52 | 69.78 | 6.89 | 6.41 |
